# Supplementary material for: Insights of under-water trophic interaction: A scenario in Chilika through the lens of Ecopath
Source: Research Square preprint supplement (doi:10.21203/rs.3.rs-2263171/v1), 2022-12-14
Supplement: Supplementary file 1 [file c4c3d984f7bccb6795b9626d.docx]

**Insights of under-water trophic interaction: A scenario in Chilika through the lens of Ecopath**

**Prajna Rithambhara Swain#, Pranaya Kumar Parida#, Basanta Kumar Das*, Bijay Kumar Behera**

**ICAR-Central Inland Fisheries Research Institute, Barrackpore, Kolkata, India – 700120**

***Basanta Kumar Das**

**Barrackpore, Kolkata, India – 700120**

**E-mail:** [**basantakumard@gmail.com**](mailto:basantakumard@gmail.com)

**#equally contributed**

Table S1: Basic Estimates of Chilika ecopath Model

|  | Group name | Trophic level | Biomass in habitat area (t/km²) | Biomass (t/km²) | Production / biomass (/year) | Consumption / biomass (/year) | Ecotrophic Efficiency | Production / consumption (/year) |
| --- | --- | --- | --- | --- | --- | --- | --- | --- |
| 1 | Irrawaddy Dolphin | 3.802595 | 0.0126 | 0.0126 | 0.2 | 12.75 | 0 | 0.01568628 |
| 2 | Crabs | 2.676449 | 0.53 | 0.53 | 2.9 | 14 | 0.3895117 | 0.2071429 |
| 3 | Prawns | 2.290802 | 2.92 | 2.92 | 5.14 | 20.58 | 0.2379662 | 0.249757 |
| 4 | Ciprinids | 2.322169 | 0.253638 | 0.253638 | 3.1 | 20 | 0.8018541 | 0.155 |
| 5 | Tripod Fish | 2.240298 | 0.116901 | 0.116901 | 1.38 | 5.5 | 0.2752946 | 0.2509091 |
| 6 | Elopiformes | 3.472628 | 0.0038 | 0.0038 | 2.1 | 13.5 | 0.7178457 | 0.1555555 |
| 7 | Eels | 3.367437 | 0.044969 | 0.044969 | 1.5 | 7.9 | 0.3625624 | 0.1898734 |
| 8 | Featherbacks | 2.726079 | 0.211654 | 0.211654 | 1.51 | 9.9 | 0.09147189 | 0.1525253 |
| 9 | Snakeheads | 3.07363 | 0.088735 | 0.088735 | 1.99 | 7.6 | 0.2452017 | 0.2618421 |
| 10 | Cichlids | 2.546468 | 0.252122 | 0.252122 | 2.26 | 15.8 | 0.2082728 | 0.143038 |
| 11 | Catfish | 2.884749 | 0.867631 | 0.867631 | 1.34 | 7.9 | 0.4287312 | 0.1696203 |
| 12 | Croakers | 3.193563 | 0.422219 | 0.422219 | 1.45 | 10.6 | 0.05320816 | 0.1367925 |
| 13 | Gerridae | 2.718717 | 0.233 | 0.233 | 3.49 | 36 | 0.795509 | 0.09694444 |
| 14 | Belonids | 3.38976 | 0.088 | 0.088 | 1.85 | 12.2 | 0.4351014 | 0.1516393 |
| 15 | Threadfins | 3.330708 | 0.202 | 0.202 | 1.03 | 4.5 | 0.3533027 | 0.2288889 |
| 16 | Perches | 3.205816 | 0.76 | 0.76 | 1.5 | 7.1 | 0.05076382 | 0.2112676 |
| 17 | Clupeoids | 2.543328 | 1.857695 | 1.857695 | 3.1 | 15 | 0.3431189 | 0.2066667 |
| 18 | Mullets | 2.394258 | 1.4995 | 1.4995 | 2.8 | 20 | 0.2274858 | 0.14 |
| 19 | Benthos | 2.201488 | 10.94 | 10.94 | 9 | 60 | 0.7146652 | 0.15 |
| 20 | Zoo plankton | 2.010101 | 2.9 | 2.9 | 48 | 133 | 0.8598639 | 0.3609022 |
| 21 | Sea grass with other macrophytes | 1 | 95.67 | 95.67 | 12.5 |  | 0.05362874 |  |
| 22 | P. karka | 1 | 254.41 | 254.41 | 12.5 |  | 0.003276915 |  |
| 23 | Phytoplankton | 1 | 7.83 | 7.83 | 134.27 |  | 0.4209001 |  |
| 24 | Detritus | 1 | 308.217 | 308.217 |  |  | 0.09403238 |  |

Table S2: Diet Matrix of Chilika Ecopath

|  | Prey \ predator | 1 | 2 | 3 | 4 | 5 | 6 | 7 | 8 | 9 | 10 | 11 | 12 | 13 | 14 | 15 | 16 | 17 | 18 | 19 | 20 |
| --- | --- | --- | --- | --- | --- | --- | --- | --- | --- | --- | --- | --- | --- | --- | --- | --- | --- | --- | --- | --- | --- |
| 1 | Irrawaddy Dolphin |  |  |  |  |  |  |  |  |  |  |  |  |  |  |  |  |  |  |  |  |
| 2 | Crabs | 0.025 | 0.01 |  |  |  | 0.05 | 0.05 |  | 0.005 | 0.005 | 0.005 | 0.005 | 0.005 | 0.0005 |  | 0.07 |  |  |  |  |
| 3 | Prawns | 0.055 | 0.076 |  |  |  | 0.1 | 0.21 | 0.08 | 0.005 | 0.005 | 0.01 | 0.2 | 0.005 | 0.094 | 0.3 | 0.25 |  |  |  |  |
| 4 | Ciprinids | 0.05 |  |  |  |  |  | 0.05 | 0.07 | 0.56 |  | 0.01 |  |  | 0.011 |  |  |  |  |  |  |
| 5 | Tripod Fish | 0.025 |  |  |  |  | 0.01 | 0.005 | 0.01 | 0.01 |  |  | 0.001 |  | 0.0005 |  | 0.001 |  |  |  |  |
| 6 | Elopiformes | 0.03 |  |  |  |  |  |  |  |  |  |  |  |  |  | 0.001 |  |  |  |  |  |
| 7 | Eels | 0.025 |  |  |  |  |  |  |  | 0.01 |  | 0.001 |  |  | 0.0005 | 0.001 | 0.001 |  |  |  |  |
| 8 | Featherbacks | 0.025 |  |  |  |  |  | 0.005 |  | 0.01 |  | 0.001 | 0.001 |  | 0.005 |  |  |  |  |  |  |
| 9 | Snakeheads | 0.025 |  |  |  |  |  | 0.003 | 0.01 |  |  | 0.001 | 0.001 |  | 0.0005 |  | 0.001 |  |  |  |  |
| 10 | Cichlids | 0.07 |  |  |  |  | 0.1 | 0.005 | 0.01 | 0.01 |  |  | 0.002 |  | 0.005 | 0.005 | 0.01 |  |  |  |  |
| 11 | Catfish | 0.07 |  |  |  |  | 0.02 | 0.005 |  | 0.01 |  |  |  |  | 0.0005 | 0.05 | 0.08 |  |  |  |  |
| 12 | Croakers | 0.07 |  |  |  |  | 0.02 | 0.005 |  |  |  | 0.001 |  |  | 0.005 | 0.001 | 0.001 |  |  |  |  |
| 13 | Gerridae | 0.1 |  |  |  |  | 0.25 | 0.05 |  |  |  | 0.005 | 0.1 |  | 0.0005 | 0.1 | 0.005 |  |  |  |  |
| 14 | Belonids | 0.07 |  |  |  |  | 0.01 |  |  |  |  |  |  |  | 0.05 |  | 0.001 |  |  |  |  |
| 15 | Threadfins | 0.06 |  |  |  |  | 0.01 | 0.005 |  |  |  | 0.001 | 0.005 |  | 0.005 |  | 0.005 |  |  |  |  |
| 16 | Perches | 0.07 |  |  |  |  | 0.02 | 0.05 |  |  |  |  | 0.005 |  | 0.005 | 0.0001 |  |  |  |  |  |
| 17 | Clupeoids | 0.11 |  |  |  |  | 0.05 | 0.1 |  |  |  | 0.01 | 0.135 |  | 0.2 | 0.127 | 0.17 |  |  |  |  |
| 18 | Mullets | 0.12 |  |  |  |  | 0.21 | 0.002 |  |  |  | 0.035 | 0.025 |  | 0.15 | 0.15 | 0.051 |  |  |  |  |
| 19 | Benthos |  | 0.459 | 0.2 | 0.1 | 0.2 | 0.1 | 0.443 | 0.3 | 0.15 | 0.35 | 0.47 | 0.35 | 0.3 | 0.467 | 0.21 | 0.154 | 0.2 | 0.16 | 0.05 |  |
| 20 | Zoo plankton |  | 0.01 | 0.05 | 0.2 |  |  |  | 0.12 | 0.05 | 0.11 | 0.2 | 0.06 | 0.34 |  | 0.005 | 0.05 | 0.3 | 0.2 | 0.14 | 0.01 |
| 21 | Sea grass with other macrophytes |  | 0.055 | 0.05 | 0.15 | 0.2 |  | 0.001 | 0.15 |  | 0.2 | 0.005 | 0.03 | 0.05 |  |  | 0.025 | 0.05 | 0.15 | 0.05 | 0.05 |
| 22 | P. karka |  |  |  |  |  |  |  |  |  |  |  |  |  |  |  |  |  |  | 0.01 | 0.01 |
| 23 | Phytoplankton |  | 0 | 0.3 | 0.3 | 0.55 |  |  | 0.05 |  | 0.23 | 0.045 | 0.01 | 0.1 |  |  | 0.025 | 0.4 | 0.39 | 0.2 | 0.69 |
| 24 | Detritus |  | 0.39 | 0.4 | 0.25 | 0.05 | 0.05 | 0.011 | 0.2 | 0.18 | 0.1 | 0.2 | 0.07 | 0.2 |  | 0.05 | 0.1 | 0.05 | 0.1 | 0.55 | 0.24 |
|  | Sum | 1 | 1 | 1 | 1 | 1 | 1 | 1 | 1 | 1 | 1 | 1 | 1 | 1 | 1 | 1 | 1 | 1 | 1 | 1 | 1 |

**Table S3: Ecological Indicators of the Chilika Ecopath Model**

| **Parameter** | **Value** | **Units** |
| --- | --- | --- |
| Sum of all consumption | 1207.602 | t/km2/year |
| Sum of all exports | 4731.606 |
| Sum of all respiratory flows | 695.7275 |
| Sum of all flows into detritus | 5222.71 |
| Total system throughput | 11857.65 |
| Sum of all production | 5697.688 |
| Calculated total net primary production | 5427.334 |
| Net system production | 4731.606 |
| Total biomass/total throughput | 0.032225 |
| Total primary production/total respiration | 7.800948 |  |
| Total primary production/total biomass | 14.20343 |
| Total biomass (excluding detritus) | 382.1144 | t/km2 |
| Connectance Index | 0.385633 |  |
| System Omnivory Index | 0.231064 |
| Ecopath pedigree | 0.476744 |
| Measure of fit, t* | 2.485337 |
| Transfer efficiency of the system | 7.298 | % |
| Transfer efficiency from producers | 8.126 |
| Transfer efficiency From detritus | 6.155 |
| Ascendency | 14206 | flowbits |
| Overhead | 19016 |
| Redundancy | 16585 |
| Average Mutual Information (AMI) | 1.198 | bits |
| System Robustness | 0.157 |  |
| Finn’s cycling Index | 1.67 | % of total throughput |
| Finn’s cycling path length | 2.185 |  |
| Predator Cycling Index | 2.6 | % of total throughput without detritus |

**The Ecopath Model**

Theory

Ecopath with Ecosim models is one of the widely recognized ecosystem models used for ecosystem-based fisheries management strategy. The ecopath models are mass balanced models and based on two basic equations.

Equation 1: Production = catch + predation + net migration + biomass accumulation + other mortality

Equation 2: Consumption = production + respiration + unassimilated food

Input parameter and Pedigree

The major input parameters for ecopath models are biomass, production/biomass, consumption/biomass and diet of each functional group. Biomass of each group are expressed in t/km2/year. The biomass, production/biomass and consumption/biomass of fish groups, phytoplankton, zoo plankton, sea grass and other macrophytes, *Phragmites karka* and detritus biomass were adopted from Swain et al., (2022) and Behera et al., (2020). For the Irrawaddy dolphin the biomass was calculated manually and the production/biomass and consumption/biomass were adopted from Mukherjee et al., 2019. The diet matrix was adopted from some basic knowledge of food and feeding of functional groups, fish base, Swain et al., 2022, Behera et al., 2020, Mukherjee et al., 2019. The pedigree analysis was carried out to check the data authenticity and the calculated pedigree was 0.477 indicating the robust data structure.

**Glossary**

*Trophic Level*: Position of the organism in a food web or chain

*Ecotrophic Efficiency*: The fraction of the production utilized in the system and also well known as the mass balanced indicator

*Total system throughput*: Sum of all flows (inputs and outputs) occurring in the system

*Total primary production/total respiration*: Maturity indicator, ratio value 1 indicates the system is mature

*Connectance Index*: Ratio between the number of actual links in a food web to its possible number of linkage in a food web

*System Omnivory Index* : the variance of the trophic level of a consumer's prey groups

*Transfer efficiency*: Ratio between the sum of exports between two adjacent trophic level and throughput at the former trophic level

*Average mutual Information*: Indicator of flow of energy between two adjacent levels

*Ascendency*: Characterise the growth and development and the product of average mutual information and total throughput of the system

*Overhead*: System reserve of the system to counter the external perturbations

*Redundancy*: Indicator of system reserve and it is the part of the overhead in internal flow

*System Robustness* Stands for the sustainability of the system

*Finn’s cycling Index*: fraction of total system throughput utilised in the system

*Predator cycling Index*: Fraction of system throughput cycled within the system without considering the detritus

Supplementary figure


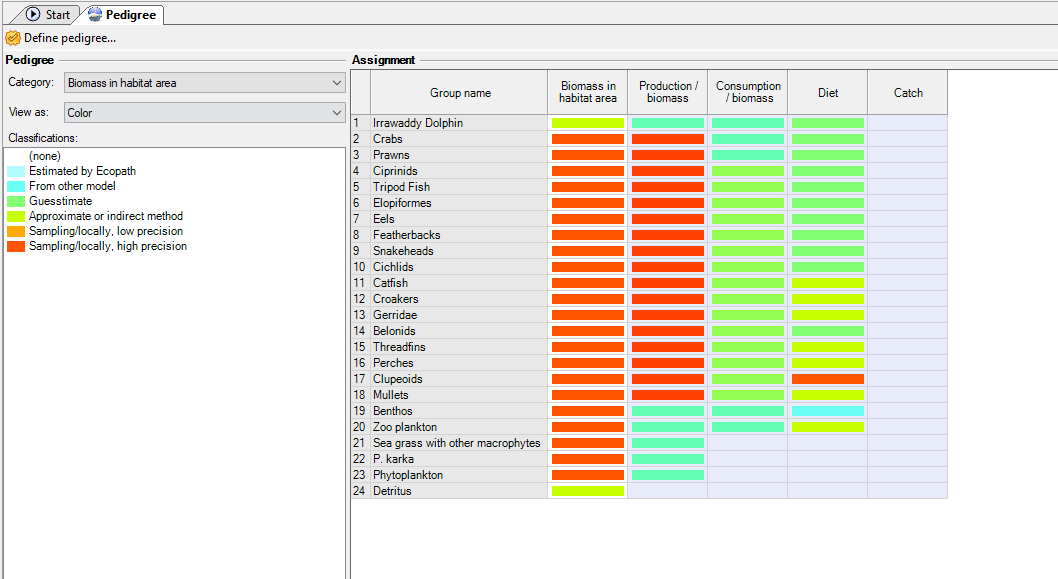


Figure S1: Pedigree Defining
